# Supplementary material
Source: Springer Nature journal article supplement (https://www.springermedizin.de/resource/supplementary/12967_2014_1850_MOESM5_ESM.pdf/9574960)

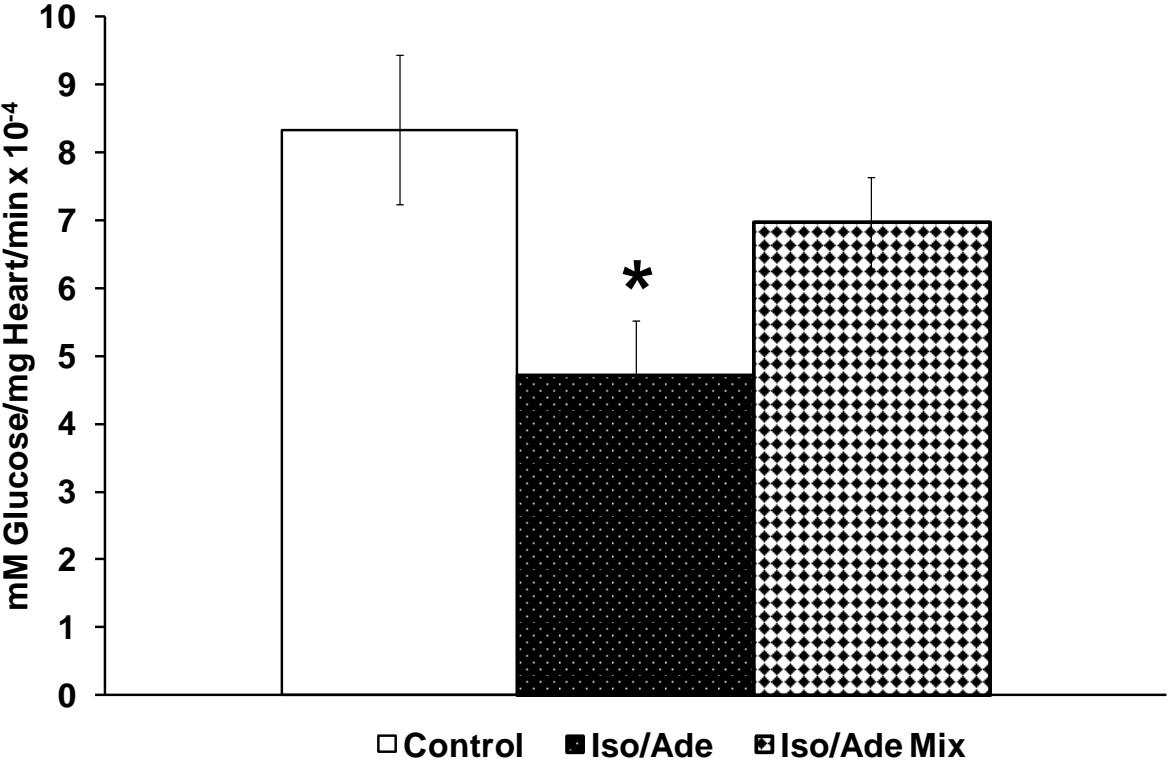

Supplement: MOESM5 [file 9574960]
